# Supplementary material
Source: PubMed Central journal article supplement (PMC7675221)

## Supplementary Online Content

Zakaria A, Miclau TA, Maurer T, Leslie KS, Amerson E. Cost minimization analysis of a teledermatology triage system in a managed care setting. *JAMA Dermatol*. Published online November 18, 2020.

doi:10.1001/jamadermatol.2020.4066

**eTable.** Cost Breakdown per Patient Visit

**eFigure 1.** Sensitivity Analysis of Dermatology Visit Cost

**eFigure 2.** Sensitivity Analysis of PCP Visit Cost

**eFigure 3.** Sensitivity Analysis of TD Triage Rates to Dermatology Visit

This supplementary material has been provided by the authors to give readers additional information about their work.

**eTable.** Cost Breakdown per Patient Visit

| Cost Component                             | Primary Care Visit Costs (per 12-month period) |                                      |             | Dermatology Clinic Visit Costs (per 7-month period) |                                      |             | TD Consult Costs (per 7-month period) |                                      |             |
|--------------------------------------------|------------------------------------------------|--------------------------------------|-------------|-----------------------------------------------------|--------------------------------------|-------------|---------------------------------------|--------------------------------------|-------------|
|                                            | FTE                                            | Average Salary with Benefits per FTE | Total costs | FTE                                                 | Average Salary with Benefits per FTE | Total Costs | FTE                                   | Average Salary with Benefits per FTE | Total Costs |
| Physicians                                 | 7.73                                           | \$307,200                            | \$2,374,656 | 4.5                                                 | \$207,573                            | \$934,080   | 0.1                                   | \$207,573                            | \$20,757    |
| Residents and Fellows                      | 3.81                                           | \$94,559                             | \$360,412   | 4                                                   | \$66,959                             | \$267,836   | 0.4                                   | \$66,959                             | \$26,783    |
| NP                                         | 2                                              | \$307,801                            | \$615,602   | -                                                   | -                                    | -           | -                                     | -                                    | -           |
| RN                                         | 6.30                                           | \$236,924                            | \$1,492,621 | 0.75                                                | \$138,205                            | \$103,654   | -                                     | -                                    | -           |
| MEA                                        | 17                                             | \$109,358                            | \$1,859,100 | 1.1                                                 | \$63,793                             | \$70,171    | -                                     | -                                    | -           |
| Front Office Staff                         | 7.80                                           | \$98,505                             | \$768,340   | 3                                                   | \$57,461                             | \$172,384   | -                                     | -                                    | -           |
| Temporary workers                          | 0.083                                          | \$270,563                            | \$22,321    | -                                                   | -                                    | -           | -                                     | -                                    | -           |
|                                            |                                                |                                      |             |                                                     |                                      |             |                                       |                                      |             |
| <b>TD costs</b>                            |                                                |                                      |             |                                                     |                                      |             |                                       |                                      |             |
| Software License Installation and Training | -                                              | -                                    | -           | -                                                   | -                                    | -           | -                                     | -                                    | \$22,129    |
| Software Support and Maintenance Services  | -                                              | -                                    | -           | -                                                   | -                                    | -           | -                                     | -                                    | \$23,168    |
|                                            |                                                |                                      |             |                                                     |                                      |             |                                       |                                      |             |
| <b>Total costs</b>                         |                                                |                                      | \$7,493,054 |                                                     |                                      | \$1,548,127 |                                       |                                      | \$92,838    |
| <b>Total number of visits or consults</b>  |                                                |                                      | 27,467      |                                                     |                                      | 4,765       |                                       |                                      | 2,098       |

|                                                       |  |  |          |  |  |          |  |  |         |
|-------------------------------------------------------|--|--|----------|--|--|----------|--|--|---------|
| <b>Average cost<br/>per patient<br/>visit/consult</b> |  |  | \$272.80 |  |  | \$324.90 |  |  | \$44.25 |
|-------------------------------------------------------|--|--|----------|--|--|----------|--|--|---------|

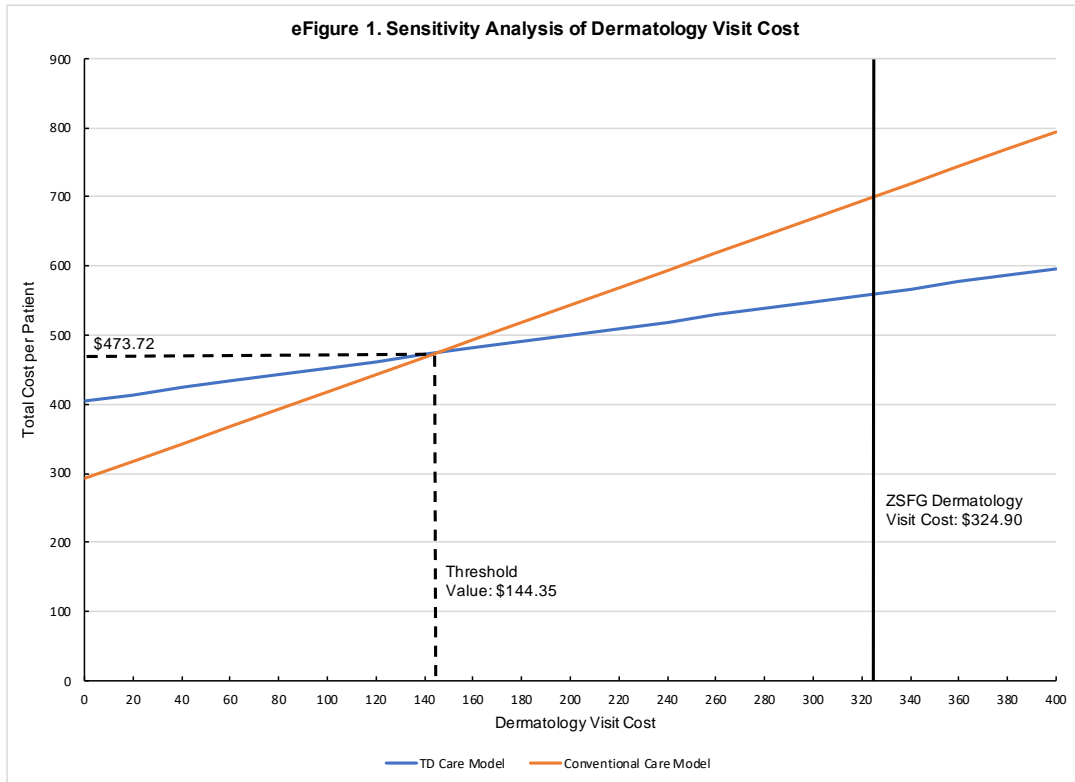

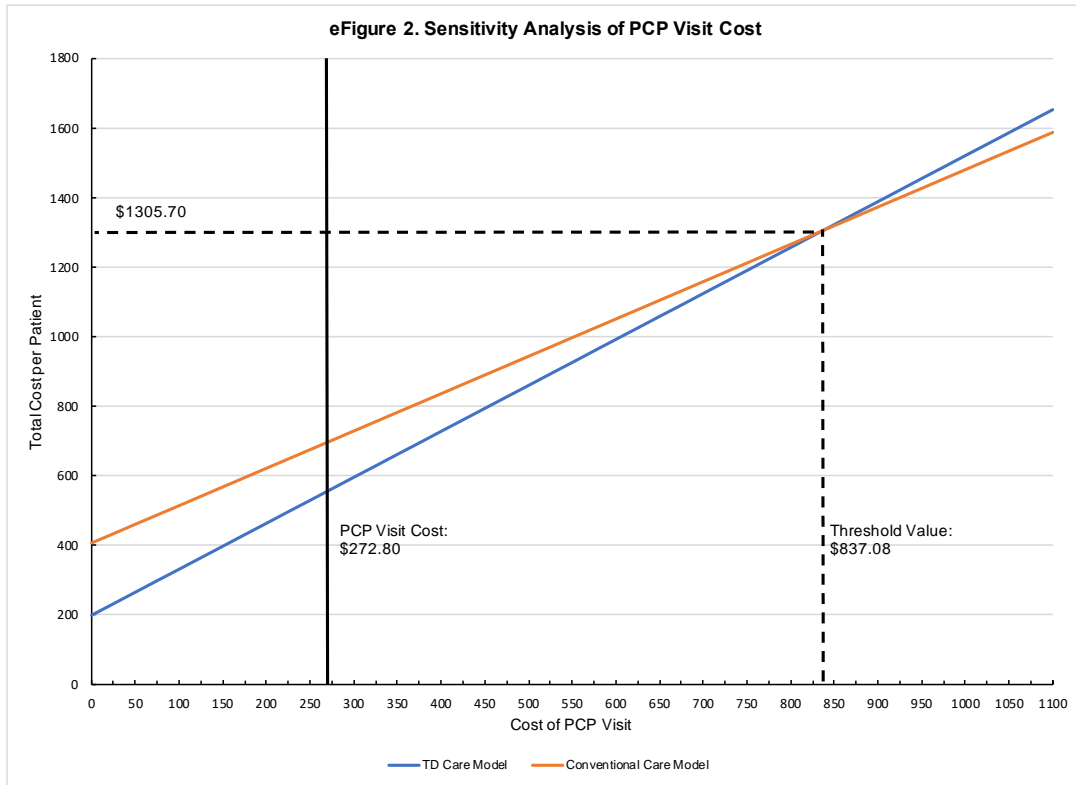

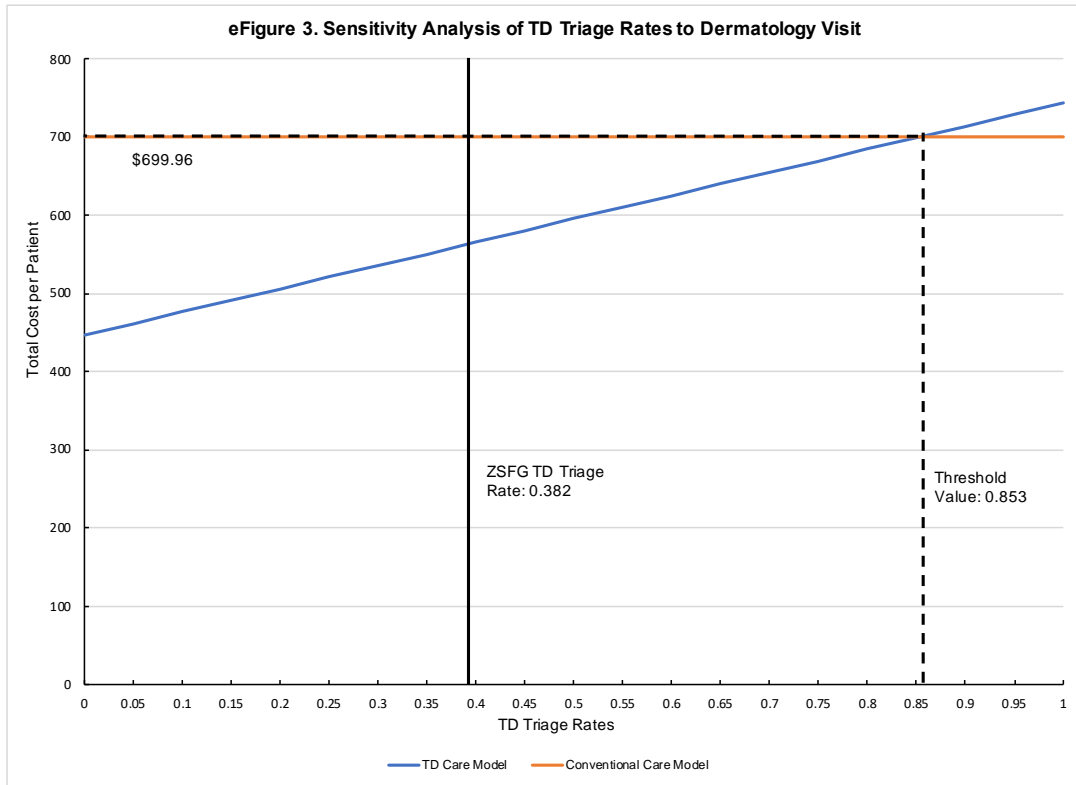

Supplement: jamadermatol-e204066-s001.pdf [file jamadermatol-e204066-s001.pdf]
